# Supplementary material for: Heritability of Protein and Metabolite Biomarkers Associated with COVID-19 Severity: A Metabolomics and Proteomics Analysis
Source: MDPI journal article supplement (doi:10.3390/biom13010046), 2022-12-27
Supplement: s1 [file s1]

|                                   |         |                                   |         |                         |              |
|-----------------------------------|---------|-----------------------------------|---------|-------------------------|--------------|
| inosine                           | 1.00    |                                   |         |                         |              |
| N-palmitoyl-D-erythro-sphingosine | 0.27    | 1.00                              |         |                         |              |
| maltose                           | 0.33    | -0.09                             | 1.00    |                         |              |
| 2-hydroxybutyrate (AHB)           | 0.12    | 0.14                              | 0.10    | 1.00                    |              |
| myo-inositol                      | 0.28    | -0.06                             | 0.24    | 0.10                    | 1.00         |
|                                   | inosine | N-palmitoyl-D-erythro-sphingosine | maltose | 2-hydroxybutyrate (AHB) | myo-inositol |

**Supplemental Figure S1: Correlation matrix of metabolites upregulated in COVID-19 disease states.**

Metabolites that were upregulated in non-severe and severe COVID-19 in the [1] dataset were identified in our erythrocyte dataset and Pearson correlations were calculated among all metabolites.

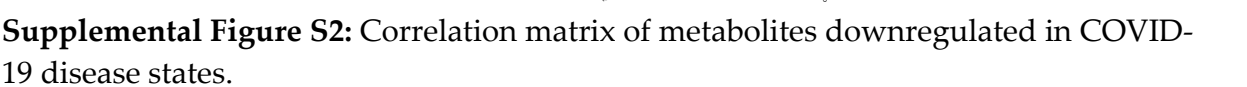

1. Shen, F.
